# Supplementary material for: A deep learning approach reveals unexplored landscape of viral expression in cancer
Source: PubMed Central journal article supplement (PMC9922274; doi:10.1038/s41467-023-36336-z), 2023-02-11
Supplement: 41467_2023_36336_MOESM1_ESM.pdf [file 41467_2023_36336_MOESM1_ESM.pdf]

**Supplementary Information for: A deep learning approach reveals unexplored landscape of viral expression in cancer**

**Supplementary Tables**

| Cancer type | Virus         | Unadjusted Log-rank p-value | FDR Adjusted Log-rank p-value for all virus-disease associations |
|-------------|---------------|-----------------------------|------------------------------------------------------------------|
| CESC        | High risk HPV | 0.71                        | 1                                                                |
| LIHC        | HBV           | 0.042                       | 1                                                                |
| LIHC        | HCV           | 0.649                       | 1                                                                |
| HNSC        | High risk HPV | 0.045                       | 1                                                                |
| KIRC        | High risk HPV | 0.95                        | 1                                                                |
| SKCM        | HBV           | 0.649                       | 1                                                                |

**Supplementary Table 1.** Survival associations between oncoviruses and cancer types.

|                      | sample                               | virus     | Avg similarity | Avg coverage | Max coverage | Contig # |
|----------------------|--------------------------------------|-----------|----------------|--------------|--------------|----------|
| Assembly using model | 6dd4e6c6-db0c-47be-ab00-883418a57f67 | NC_003977 | 92.9581889     | 75.9222222   | 100          | 86       |
|                      | 5c57b82a-e94f-43e2-a281-f5b2c5d030c4 | NC_003977 | 93.4691543     | 78.4571429   | 100          | 170      |

|                                    |                                                      |               |                |                |     |     |
|------------------------------------|------------------------------------------------------|---------------|----------------|----------------|-----|-----|
|                                    | 852a326d-<br>d81f-43df-<br>96d5-<br>256db17f13a<br>4 | NC_00397<br>7 | 92.847990<br>4 | 92.225080<br>4 | 100 | 297 |
|                                    | d34e8f7d-<br>bdb0-41e6-<br>9b28-<br>d50189d68cd<br>a | NC_00397<br>7 | 92.782666<br>7 | 92.444444<br>4 | 100 | 9   |
|                                    | 4c20ae1d-<br>ad19-4424-<br>a62b-<br>622c4fbf4397     | NC_00140<br>1 | 97.366063<br>1 | 96.639639<br>6 | 100 | 106 |
|                                    | 90fca208-<br>cdd6-4a29-<br>85ee-<br>f1e27fe4a536     | NC_00397<br>7 | 94.774968<br>8 | 68.427083<br>3 | 100 | 95  |
|                                    | a0f39d3d-<br>bf2f-4e4e-<br>82c7-<br>b6bdb45ee0d<br>4 | NC_00397<br>7 | 94.675822<br>2 | 72.422222<br>2 | 100 | 44  |
| Assembl<br>y not<br>using<br>model | 6dd4e6c6-<br>db0c-47be-<br>ab00-<br>883418a57f6<br>7 | NC_00397<br>7 | 93.390442      | 76.789855<br>1 | 100 | 133 |
|                                    | 5c57b82a-<br>e94f-43e2-                              | NC_00397<br>7 | 93.870603<br>7 | 80.262963      | 100 | 254 |

|                                                      |               |                |                |     |     |
|------------------------------------------------------|---------------|----------------|----------------|-----|-----|
| a281-<br>f5b2c5d030c4                                |               |                |                |     |     |
| 852a326d-<br>d81f-43df-<br>96d5-<br>256db17f13a<br>4 | NC_00397<br>7 | 92.557143<br>9 | 91.925659<br>5 | 100 | 403 |
| d34e8f7d-<br>bdb0-41e6-<br>9b28-<br>d50189d68cd<br>a | NC_00397<br>7 | 94.190166<br>7 | 82.083333<br>3 | 100 | 12  |
| 4c20ae1d-<br>ad19-4424-<br>a62b-<br>622c4fbf4397     | NC_00140<br>1 | 96.811156      | 95.709219<br>9 | 100 | 135 |
| 90fca208-<br>cdd6-4a29-<br>85ee-<br>f1e27fe4a536     | NC_00397<br>7 | 94.744812<br>5 | 70.523437<br>5 | 100 | 126 |
| a0f39d3d-<br>bf2f-4e4e-<br>82c7-<br>b6bdb45ee0d<br>4 | NC_00397<br>7 | 94.236928<br>6 | 73.875         | 100 | 55  |

**Supplementary Table 2.** Comparison of naïve assembly with and without using model scores over 10 LHC samples

## Supplementary Figures

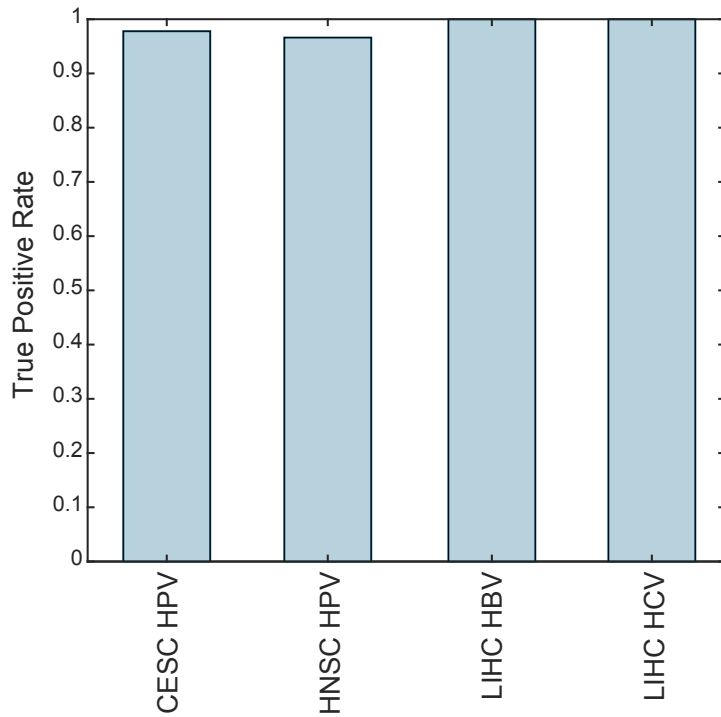

**Supplementary Figure 1. The proportions of TCGA samples that are identified as virus-positive by viRNAtrap that were also verified as virus-positive through TCGA clinical information.** From left to right: HR-HPV-positive in CESC, HR-HPV-positive in HNSC, HBV-positive in LIHC and HCV-positive in LIHC. HR-HPV: high-risk human papilloma virus; HBV: hepatitis B virus; HCV: hepatitis C virus.

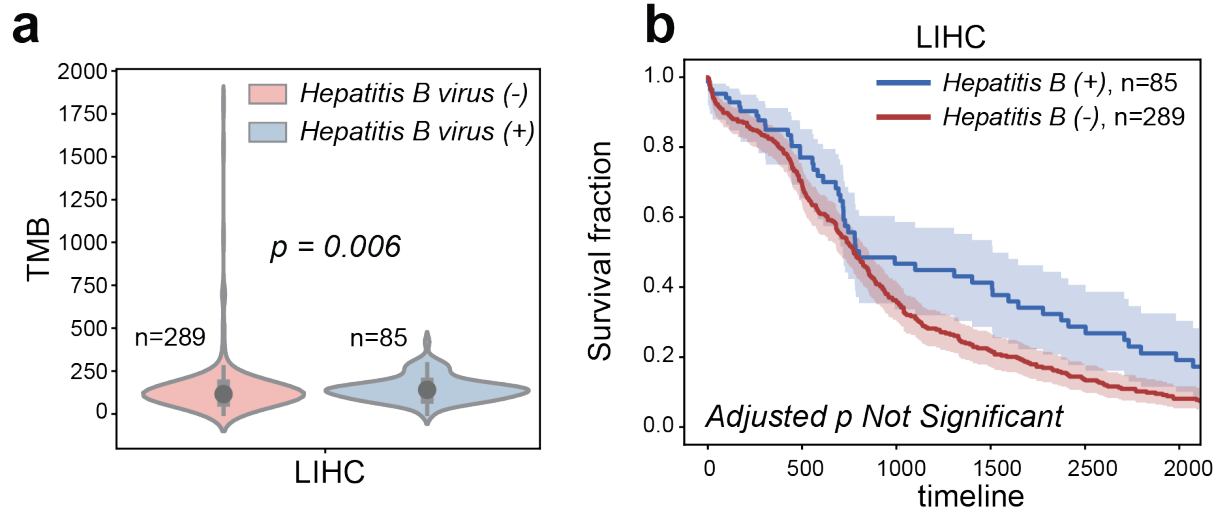

**Supplementary Figure 2. Hepatitis B viruses correlates in LIHC patients.** (a) Violin plots comparing the tumor mutation burden (TMB) between LIHC patients where expression of Hepatitis B viruses was detected vs those patients where it was not detected. Black dots represent the medians, and the boundaries of the violin plots refer to the maximum and minimum values, respectively. (b) Kaplan-Meier curves comparing the survival rates between LIHC patients where the expression of Hepatitis B viruses was detected (blue curve) vs those where the expression of Hepatitis B viruses was not detected (red curve). For Kaplan–Meier curves, shaded areas represent the confidence interval of survival. The FDR adjusted p-value is not significant (Supplementary Table 1).

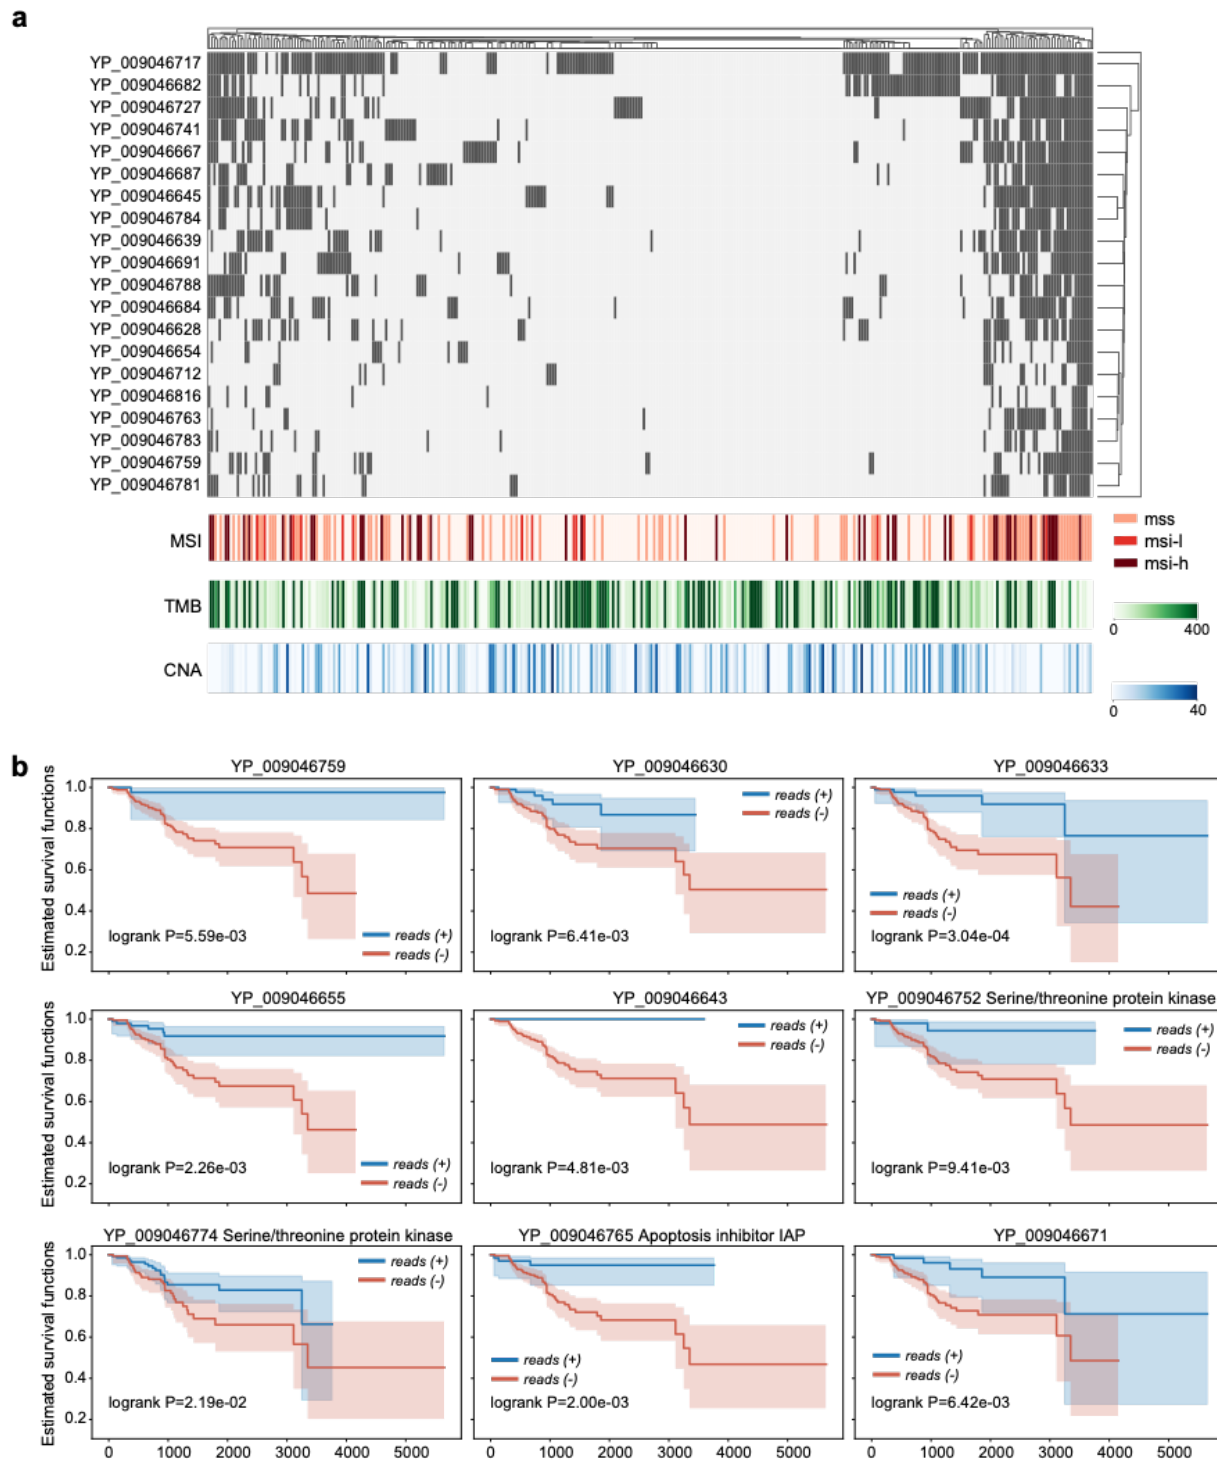

**Supplementary Figure 3. IIV31 correlates in UCEC patients.** (a) Heatmaps showing IIV31 proteins expressed in different tumors, microsatellite instability, chromosomal aneuploidy, and tumor mutation burden (TMB) across endometrial cancer samples. For Kaplan–Meier curves, shaded areas represent the confidence interval of survival

(b) Kaplan-Meier survival curves comparing survival based on presence (blue) or absence (red) of different IIV31 proteins in endometrial cancer samples.

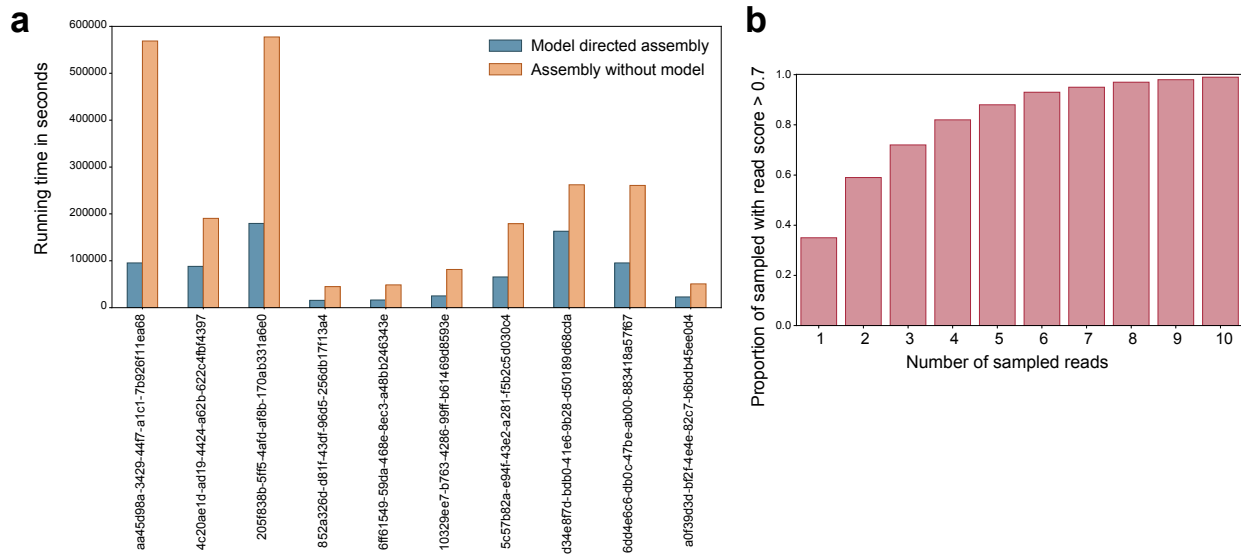

**Supplementary Figure 4. viRNAtrap algorithm evaluation.** (a) Running time (seconds, y-axis) comparison of naïve assembly with and without using model scores over 10 LHC samples. The naïve assembly that is not using the model scores takes up to 6 times longer to complete. (b) Simulation analysis to evaluate the number of viral reads for identification with the viRNAtrap model score threshold of 0.7. From 10,000 randomly sampled groups of viral reads from the test dataset with different group sizes (x-axis), the proportion of groups with at least one viral read scored above 0.7 (y-axis).

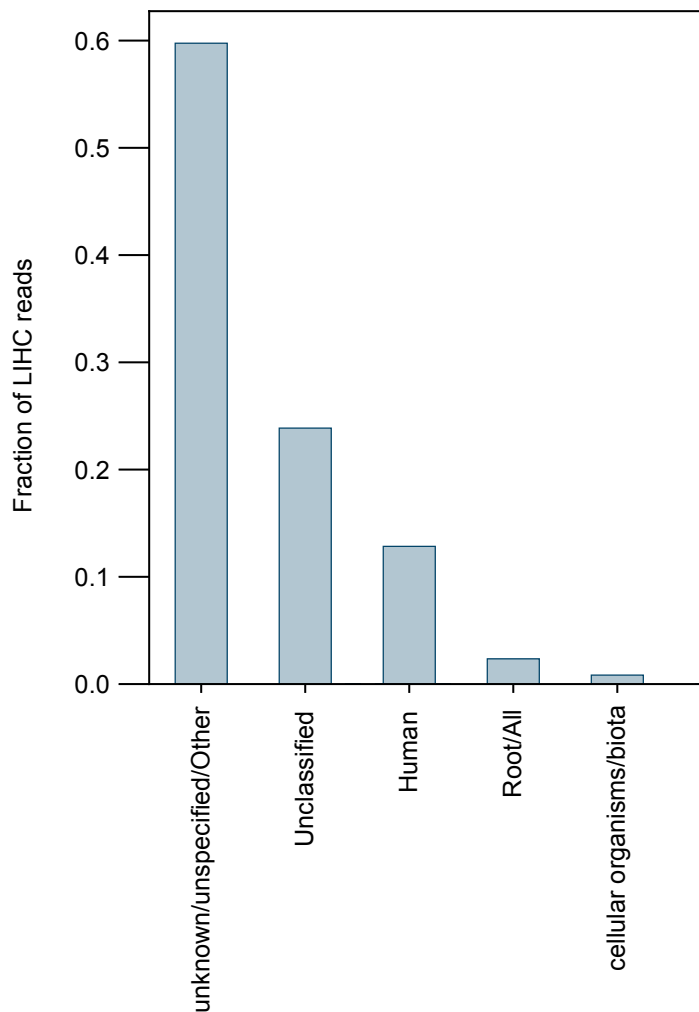

**Supplementary Figure 5. Kraken2 evaluation for LIHC RNAseq reads.** Barplot showing the classification of LIHC reads (which are 48bp), that were unmapped to human and the Phix phage by Kraken2.

### Supplementary methods

#### Reverse-transcriptase qPCR (RT-qPCR)

RNA was extracted using TRIzol reagent (Invitrogen, cat. no. 15596026). Extracted RNA was used for reverse-transcriptase PCR using a High-capacity cDNA reverse transcription kit (Thermo Fisher, cat. no. 4368814). Quantitative PCR was performed using a QuantStudio 3 real-time PCR system. GAPDH was used as an internal control.



The fold change was calculated using the  $2^{-\Delta\Delta Ct}$  method. The primers used for reverse-transcriptase qPCR are:

*GAPDH* forward, GTCTCCTCTGACTTCAACAGCG and reverse, ACCACCCTGTTGCTGTAGTAGCCAA.

COV318 contig1 forward, TTGCGATGCGTACTCAGACT and reverse, 5'-CTCTTTTTGGTCAGCAGCGG-3'.

The primers are designed based on the template:

>contig1[[0.9004159]] terminase

TTCCGATCTCCTTGGCCGCATATTGCGATGCGTACTCAGACTACATCAAATGCACA  
AAAATCATTCAAGAAGAAGGTTTGGTGGTTGAGTACACCAACAAGGCAGCTGAAAC  
CAATAAAGTCGCTCATCCGCTGCTGACCAAAAAGAGACAACACTGTTC

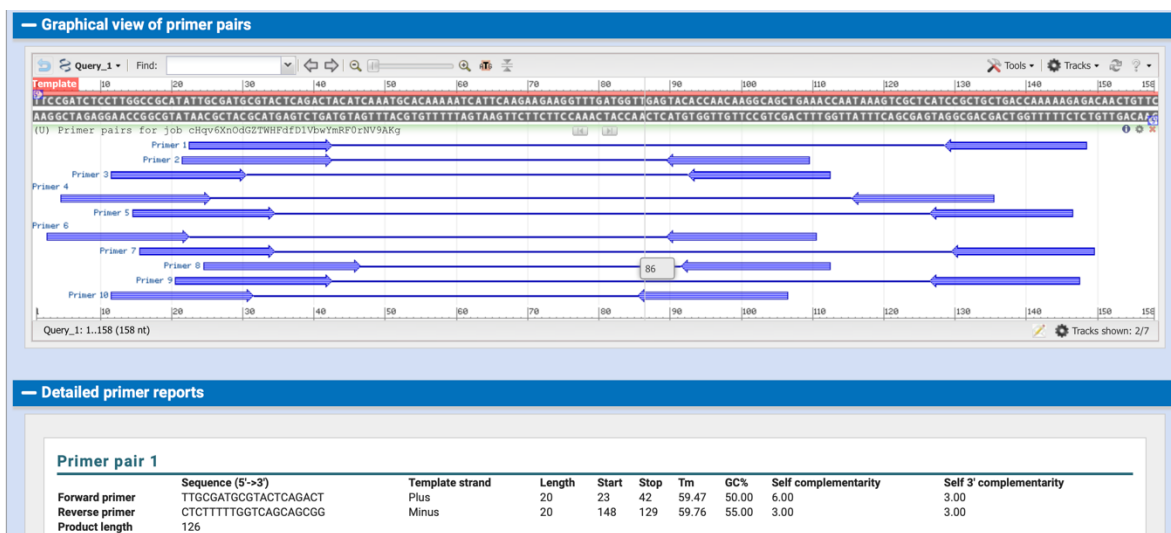

## Training existing methods for virus identification

1. *DeepViFi*. We trained DeepViFi as instructed in the method's github repository, <https://github.com/UCRajkumar/DeepViFi>. A transformer was trained using the parameters defined in the configuration file, with embedding dimension of 128, 16 heads, 8 layers, the feed forward dimension set to 256 and the batch size set to 256. The

generated embedding by the transformer for each sequence read was used to train a random forest classifier using the transformer representation (through sklearn.ensemble), with 500 trees as recommended by DeepViFi.

2. *DeepVirFinder*. We followed the instructions of DeepVirFinder github repository:

<https://github.com/jessieren/DeepVirFinder> to train a model and evaluate it using our data. Even though DeepVirFinder was developed to take various input sizes (300bps, 500bps and 1000bps), there is an option to choose input size less than 300bps, which we used by setting the input size to 48. We used the parameters as defined by the authors to train the model as following: dropout convolutional neural network (CNN) of 0.1, dropout pool of 0.1, learning rate of 0.001 and number of filters of 500, of which each of length of 10.

3. *ViraMiner*. The ViraMiner model was trained as end-to-end CNN model as instructed in its github repository, <https://github.com/NeuroCSUT/ViraMiner>. The model was trained with filter size 8, dropout of 0.1, learning rate of 0.001 and layer\_size of 1000. Even though the input sequence length in the original method was defined to be 300bps, we modified the code (specifically, we modified helper\_with\_n.py line 73 from 300 to 48) to accept input sequences of size 48bps.

4. *Off-the-shelf seq2seq*. We trained off-the-shelf seq2seq model using Keras (with LSTM components) on our data by configuring the model to take 48bp input sequences and the embedding size was defined to be of size 64 while the learning rate was set to 0.001. Then, to accommodate to DeepViFi, which also compared their representation against off-the-shelf seq2seq model, the seq2seq representation of viral sequences was given as input to a random forest classifier (using sklearn.ensemble) with the same parameter defined, the number of trees, to be 500.
